# Supplementary material
Source: Springer Nature journal article supplement (https://www.springermedizin.de/resource/supplementary/12943_2009_611_MOESM14_ESM.pdf/9555104)

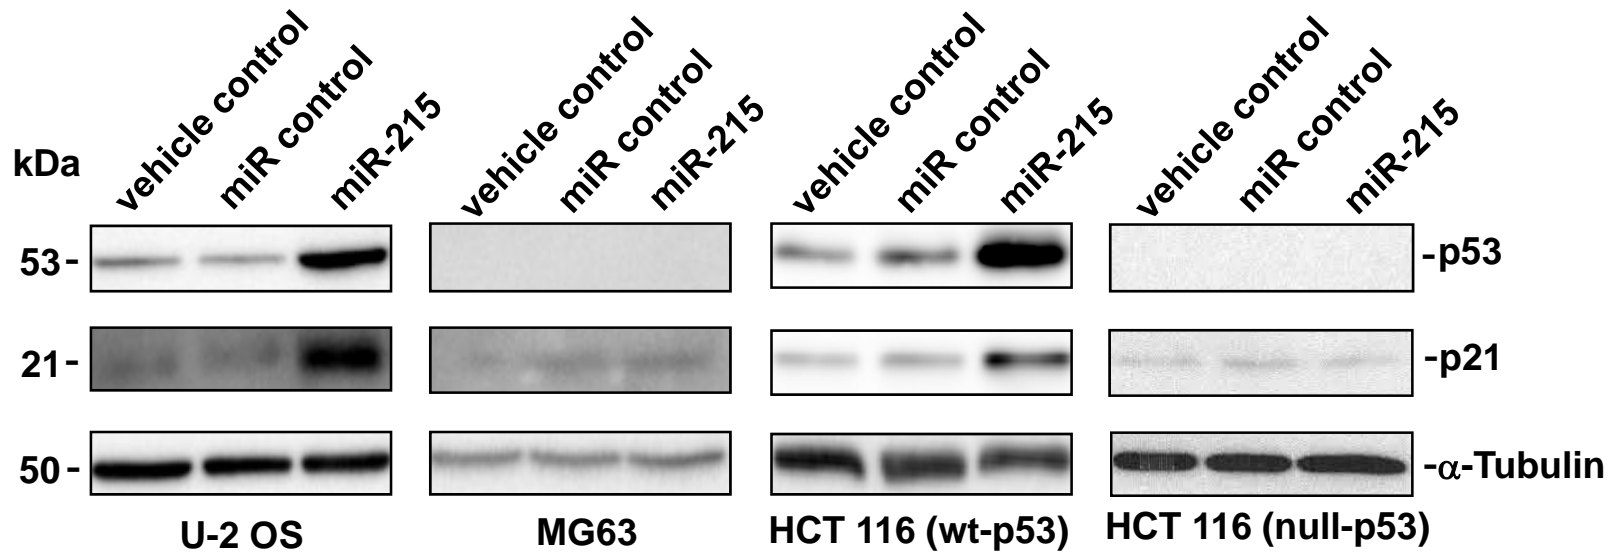

Supplement: MOESM14 [file 9555104]
